# Supplementary material for: Characterization and Interaction Analysis of the Secondary Cell Wall Synthesis-Related Transcription Factor PmMYB7 in Pinus massoniana Lamb
Source: MDPI journal article supplement (doi:10.3390/ijms23042079), 2022-02-14
Supplement: s1 [file s1]

Supplementary 1

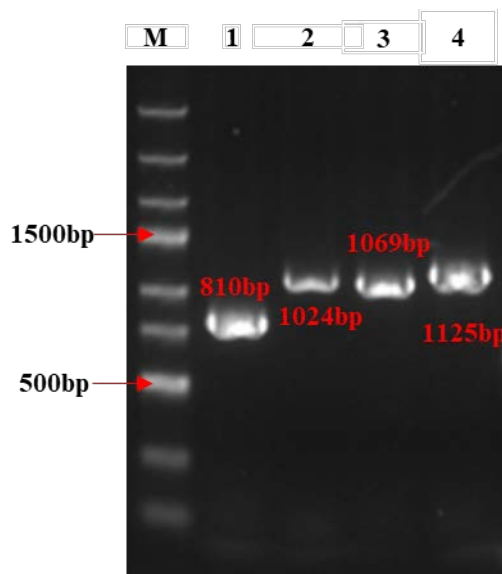

Figure 1 Cloning of *PmMYB7* gene

Note: (M: NormalRun™ 250 bp-II DNA ladder). 1. PCR amplification product of the intermediate fragment; 2. PCR amplification product of the 3' RACE fragment; 3. PCR amplification product of the 5' RACE fragment. 4. Cloning of the ORF fragment.

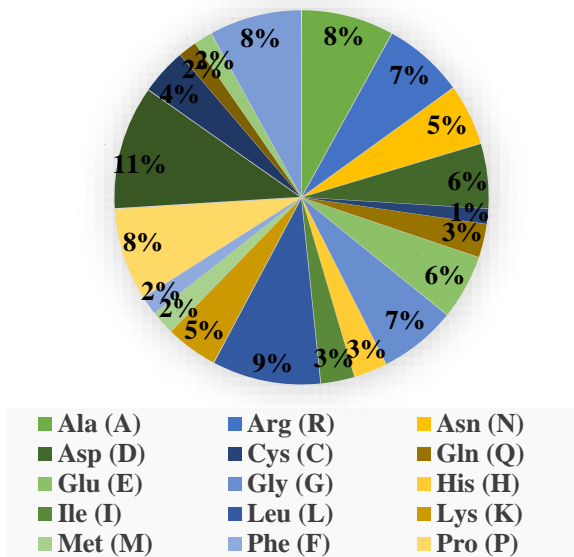

Figure 2 Proportions of amino acids in the *PmMYB7* protein.

The predicted secondary structure includes chiefly 60.43% random coil and 30.21%  $\alpha$ -helices. There are 42 negatively charged residues (Asp + Glu) and 43 positively charged residues (Arg + Lys) in the protein structure. The 20 amino acids and their proportions are shown in Fig 2.
