# Supplementary material for: Characterization and Interaction Analysis of the Secondary Cell Wall Synthesis-Related Transcription Factor PmMYB7 in Pinus massoniana Lamb
Source: MDPI journal article supplement (doi:10.3390/ijms23042079), 2022-02-14
Supplement: s1 [file s1]

>1-4

AATCACTACTGTGATGATAACGAAGACAATTCCAAGGAGCTGAAAATCATCATCATCATCATCAT  
CAATCAGCTAAGATTAAGAATTATGATAAACCTAAACCGTTCGGTTTCGATTTGGATCGTATTATCAT  
TATTTCTCTCACTCTTCCTTTCTCAAGCTGAAGTTATAACCCTAACTCCTGAAACATTCTCTGACAAGG  
TGAAGGAGAAAGACACGGCATGGTTTGTCAAATTTTGTGTGCCATGGTGTAAAGCATTGTAAGAATTTG  
GGGACCTTGTGGGAAGAGGTTGGGAAGGCAATGGAGGGGGAAGATGAAATAGAGGTTGGAGAAGTT  
GACTGCGGCGCCAGCAAATCTGTCTGTTCTAAAGCTGATATCCACTCTTACCCTACTTTTAAGCTCTTT  
TTTGATGGAGAAGAAGTTGCTAAATATCAAGGGCCAAGAGATGTTGAATCTCTTAAAGCATTTCGTTTT  
AGATGAAGCAGAAAAGGCAGCAGCTAAAGCACAGCTTGGCTATGATAAAGATTTGTGAGCGTTTGTA  
AGGcAAATCTCCTTTTCaATATTTCCATCTGTTTGTCAATAGTGATTTATCCAGAGACGTTGTGGACATCC  
CCATTGGGGCAGTGGAGCCTCACAATGGAATAAATTTGATTTTGCAAACGCCCCAGTTCAGATTACCT  
TGTGCGTTGTAGCAGATAATATTTGACAATATGCCCATTTTGGTTGTCATCTTGTAGGAGGAGGTCTG  
CAACAATGGATGGAAACCCAGTCAGGAATATAACAAAACTTGTAGGCACTGATAATGGATCCATT  
GCGAAGTTATATCATCCTTACACAGGAATTTCAACATAATGTCTTGAACAGTTTAATTATATTAGCGA  
GTGTAATTGGTAACATATTTTCTCTTCTAAACAAGCGAAGTTAGTGAAAAAAAAAAAAAAAAAAAAAA  
AA

PREDICTED: Populus alba protein disulfide-isomerase 5-1 (LOC118034619), transcript variant X1, mRNA.  
XM\_035039958.1

| Descriptions                                                                                                             |                                                                                                          |                 |             |                        |           |             |             |         |            |          |                                |
|--------------------------------------------------------------------------------------------------------------------------|----------------------------------------------------------------------------------------------------------|-----------------|-------------|------------------------|-----------|-------------|-------------|---------|------------|----------|--------------------------------|
| Sequences producing significant alignments                                                                               |                                                                                                          |                 |             |                        |           |             |             |         |            |          |                                |
| <input type="checkbox"/> select all 0 sequences selected                                                                 |                                                                                                          |                 |             |                        |           |             |             |         |            |          |                                |
| <a href="#">GenBank</a> <a href="#">Graphics</a> <a href="#">Distance tree of results</a> <a href="#">New MSA Viewer</a> |                                                                                                          |                 |             |                        |           |             |             |         |            |          |                                |
|                                                                                                                          | Description                                                                                              | Scientific Name | Common Name | Taxid                  | Max Score | Total Score | Query Cover | E value | Per. Ident | Acc. Len | Accession                      |
| <input type="checkbox"/>                                                                                                 | <a href="#">PREDICTED: Populus alba protein disulfide-isomerase 5-1 (LOC118034619), transcript va...</a> | Populus...      | white po... | <a href="#">43335</a>  | 1711      | 1711        | 97%         | 0.0     | 99.89%     | 992      | <a href="#">XM_035039958.1</a> |
| <input type="checkbox"/>                                                                                                 | <a href="#">PREDICTED: Populus trichocarpa protein disulfide-isomerase 5-1 (LOC7491175), transcri...</a> | Populus...      | black co... | <a href="#">3694</a>   | 1437      | 1437        | 94%         | 0.0     | 95.70%     | 978      | <a href="#">XM_002313510.3</a> |
| <input type="checkbox"/>                                                                                                 | <a href="#">PREDICTED: Populus euphratica protein disulfide-isomerase 5-1 (LOC105114437), transc...</a>  | Populus...      | Euphrat...  | <a href="#">75702</a>  | 1399      | 1399        | 97%         | 0.0     | 94.04%     | 995      | <a href="#">XM_011010982.1</a> |
| <input type="checkbox"/>                                                                                                 | <a href="#">PREDICTED: Populus alba protein disulfide-isomerase 5-1 (LOC118034619), transcript va...</a> | Populus...      | white po... | <a href="#">43335</a>  | 1000      | 1363        | 77%         | 0.0     | 99.82%     | 801      | <a href="#">XM_035039959.1</a> |
| <input type="checkbox"/>                                                                                                 | <a href="#">PREDICTED: Populus euphratica protein disulfide-isomerase 5-1 (LOC105114437), transc...</a>  | Populus...      | Euphrat...  | <a href="#">75702</a>  | 850       | 1346        | 94%         | 0.0     | 95.40%     | 957      | <a href="#">XM_011010983.1</a> |
| <input type="checkbox"/>                                                                                                 | <a href="#">PREDICTED: Populus trichocarpa protein disulfide-isomerase 5-1 (LOC7491175), transcri...</a> | Populus...      | black co... | <a href="#">3694</a>   | 699       | 699         | 45%         | 0.0     | 95.89%     | 867      | <a href="#">XM_024608065.1</a> |
| <input type="checkbox"/>                                                                                                 | <a href="#">PREDICTED: Populus euphratica protein disulfide-isomerase 5-1 (LOC105114437), transc...</a>  | Populus...      | Euphrat...  | <a href="#">75702</a>  | 662       | 662         | 45%         | 0.0     | 94.52%     | 827      | <a href="#">XM_011010981.1</a> |
| <input type="checkbox"/>                                                                                                 | <a href="#">PREDICTED: Jatropha curcas protein disulfide-isomerase 5-1 (LOC105628125), mRNA</a>          | Jatroph...      | NA          | <a href="#">180498</a> | 431       | 431         | 39%         | 7e-116  | 87.43%     | 1000     | <a href="#">XM_012209472.3</a> |

>2-1

GGAGACAATCACTCCGACCTGACTATATCAAGATGTTTGTATTGGATGAAGCAGATGAAATGCTCTCA  
AGAGGATTCAAGGATCAGATATATGATATTTTCCAATTACTGCCCCAAAGATTTCAGGTTGGGGTCTT  
CTCTGCTACTATGCCACCTGAGGCCCTAGAAATTACGAGGAAGTTCATGAATAAACCTGTGAGGATTT  
TAGTGAAGCGTGATGAGCTTACCCTTGAGGGTATCAAGCAATTCTATGTTAATGTTGACAAGGAGGA  
ATGGAAGCTTGAGACACTTTGTGATCTATATGAGACCTTGGCAATAACCCAAAGTGTTATCTTTGTGA  
ACACCAGGCGCAAGGTGGATTGGCTCACAGACAAGATGCGCAGTCGTGATCACACAGTCTCTGCCAC  
TCATGGAGATATGGACCAAAACACAAGGGACATTATTATGCGAGAATTCCGCTCTGGTTCCCTCTCGTG  
TGCTGATCACTACTGATCTGTTGGCCCGTGGTATTGATGTCCAGCAAGTCTCACTTGTGATCAATTATG  
ATCTCCCTACCCAGCCAGAGAACTACCTCCATCGTATTGGTCGTAGTGGACGTTTTGGAAGGAAGGGT  
GTTGCTATAAACTTTGTTACCAGGGACGATGAAAGAATGCTTCTGACATCCAGAGATTCTATAATGT

AACGGTTGAGGAGCTGCCATCAAATGTTGCTGATCTTCTTTGAAGCAATTTTGGTTCTCCAAGGTAAA  
TGGCTGAGCTTGGAAGTTAAACTATTATGCTGTTTGCAGTTTTGGGGCCTCTATTTAGCATGGATTG  
GACTAGCCCTGCAGGTTTGGTTCTGAGCATTTGAGATTGGGGTCAATCCCATTTTCGGGTGCAGGAGTC  
CCTTGTGTAAATTTTGTGCAAGTTTGTTTTTGCTTTTTCTTTTTGTGTGCGGAGTAAAATTTGCAGAA  
TTATGGTAGTGTCCATCATAATATTTTACTCTCTGCGTGGTTTTTCATTTTATGCAAGGGAATTTTCATG  
TAGGTAAAAAACATATGATAAAGTCATTATGTTATAATATTGGGCTCTCCGTTGCTGTTCTCTTGAGC  
AATAAAAAAAAAAAAAAAAAAAAAAAAAA

PREDICTED: *Populus alba* eukaryotic initiation factor 4A-9-like (LOC118030765), transcript variant X2, mRNA.  
XM\_035035016.1

| Descriptions                                                                                                                                  | Graphic Summary    | Alignments | Taxonomy    |             |         |            |          |                                |
|-----------------------------------------------------------------------------------------------------------------------------------------------|--------------------|------------|-------------|-------------|---------|------------|----------|--------------------------------|
| Sequences producing significant alignments                                                                                                    |                    |            |             |             |         |            |          |                                |
| Download <span>▼</span> <span>New</span> Select columns <span>▼</span> Show <span>100</span> <span>▼</span> <span>?</span>                    |                    |            |             |             |         |            |          |                                |
| <input checked="" type="checkbox"/> select all 100 sequences selected                                                                         |                    |            |             |             |         |            |          |                                |
| <a href="#">GenBank</a> <a href="#">Graphics</a> <a href="#">Distance tree of results</a> <span>New</span> <a href="#">MSA Viewer</a>         |                    |            |             |             |         |            |          |                                |
| Description                                                                                                                                   | Scientific Name    | Max Score  | Total Score | Query Cover | E value | Per. Ident | Acc. Len | Accession                      |
| <input checked="" type="checkbox"/> PREDICTED: Populus alba eukaryotic initiation factor 4A-9-like (LOC118030765), transcript variant X2, ... | Populus alba       | 2004       | 2004        | 97%         | 0.0     | 99.73%     | 1823     | <a href="#">XM_035035016.1</a> |
| <input checked="" type="checkbox"/> PREDICTED: Populus alba eukaryotic initiation factor 4A-9-like (LOC118030765), transcript variant X1, ... | Populus alba       | 2004       | 2004        | 97%         | 0.0     | 99.73%     | 1832     | <a href="#">XM_035035015.1</a> |
| <input checked="" type="checkbox"/> Populus trichocarpa clone WS0111_L18 unknown mRNA                                                         | Populus trichoc... | 1969       | 1969        | 99%         | 0.0     | 98.83%     | 1779     | <a href="#">EF145043.1</a>     |
| <input checked="" type="checkbox"/> PREDICTED: Populus trichocarpa eukaryotic initiation factor 4A-9 (LOC7470684), transcript variant X3, ... | Populus trichoc... | 1956       | 1956        | 97%         | 0.0     | 98.99%     | 1822     | <a href="#">XM_024604079.1</a> |
| <input checked="" type="checkbox"/> PREDICTED: Populus trichocarpa eukaryotic initiation factor 4A-9 (LOC7470684), transcript variant X2, ... | Populus trichoc... | 1956       | 1956        | 97%         | 0.0     | 98.99%     | 1822     | <a href="#">XM_024604078.1</a> |
| <input checked="" type="checkbox"/> PREDICTED: Populus trichocarpa eukaryotic initiation factor 4A-9 (LOC7470684), transcript variant X1, ... | Populus trichoc... | 1956       | 1956        | 97%         | 0.0     | 98.99%     | 1823     | <a href="#">XM_002308509.3</a> |
| <input checked="" type="checkbox"/> PREDICTED: Populus euphratica eukaryotic initiation factor 4A-9-like (LOC105122170), transcript varia...  | Populus euphra...  | 1912       | 1912        | 97%         | 0.0     | 98.35%     | 1812     | <a href="#">XM_011021112.1</a> |
| <input checked="" type="checkbox"/> PREDICTED: Populus euphratica eukaryotic initiation factor 4A-9-like (LOC105122170), transcript varia...  | Populus euphra...  | 1912       | 1912        | 97%         | 0.0     | 98.35%     | 1814     | <a href="#">XM_011021111.1</a> |
| <input checked="" type="checkbox"/> PREDICTED: Populus trichocarpa eukaryotic initiation factor 4A-15 (LOC112325060), transcript variant, ... | Populus trichoc... | 1428       | 1428        | 96%         | 0.0     | 90.53%     | 1808     | <a href="#">XM_024590479.1</a> |

>2-3

AGAGCTACATAGACAAGCAGATGCAATCTTCCACCTCTATGGAACGGTCACTGCTCTTCTCTCTTTCT  
TGCTCTTCTCAATATCCATCGTTGCCCAATCTACTGTCCCTTCAAATTCCACATTTAAGAAAGTCAATA  
CTGGAGAGTGGGCGGAAGCCATTTACAGAGTACCGTTCAGATTTTCGTGCCCTGGACATCTCTACCTCC  
GTTTTCCAAGTTTGCTTTTATAACACCACCCCTAATGCATTCACTCTCGCAATACGTATGGGTACGAGG  
AGGTCACCGGCAGTGAGGCGGTTTGTGTTGGGAAGCCAACCGAGGCAACCCAGTTGGTGAAGATGCCA  
CTCTCACTTTTGGTGAGGACGGAACCTTATCTTGGCCGATGCTGATGGCAGGGTTGCTTGGCAAACC  
AACACTGCCGACAAAGGTGTTGTAGGGTTGCAAATGCTACCGAATGGTAACATGGTGCTTCATGACT  
CTAAGGGCAATTTTCATCTGGCAAAGTTTGTATTATCCCACTGATACTCTTTTGGTGGGTCAATCTCTTC  
GTGTTGGAGCCGTAACCAGGCTTGTGAGTCGAGCCTCTGACAAAATGAACACAAACGGAGCCTATAG  
TCTGGTATTAGAACCCAAAAGAATAGCCATGTACTATAAGAGTCCAACTCTCCCAAGCCATACGTCT  
ACTACACATCTGATTTGTTTAGTATACAGAAAGGGCGTCTACAATATGTGAGGCTAATCAATTCGGCT  
AATGACCTGAGTCTTCAGTTCTCTACCGGTGGTGGACCCTTGCTCTCTAAGCCCGATTTCAACAGCAC  
GTTGTCATTTCTCCGGCTTGGGGTAGATGGCAATCTTAGAGTCTACAGTTTCAACAACCAGGAACTT  
CAGCTTCTTGGGACGTGACTTTCACTCTTTTCTCCAAAGATGTAGGTGTTTGGGAAAGTGAGTGTCAA  
TTACCAGAGAAATGTGGCAAGTTTGGGCTCTGTGAGGACAGCCAATGCGTTGGTTGCCCGTTACCAA  
ATGGGCTCGGGAAGTGGACCGAGAGCTGTGAACCTGTGAAGGTGACTGTATGTAACAAGAACTTCCA  
TTACTATAAACTAGAAGGGGTTGATCATTCCATGAGCAAGTATGGAAAAGGAAATGGACCCTTGAAG  
GAGAACGATTGTGAGAAGGAATGTTCCAGTGACTGCAAGTGTTTCAGGTACTTTTACAACACAAAGA  
CATCTATGTGTTGGATTGCTTATGATCTGCAAACCTCTGACGAGGGTTGCAAATTCTACACATGTGGGT

TACATAAAAGTGCCGAATCACCAGTGAAGCTGGCCTGCTTGTTCACCAAGGCATGTAGTAGAATAC  
 TGAGATCGTTTACTTGGCGAGGCTAGTTTATCGCTTGCTGACATTTCTGGAGCAGTGTTCGTTGCAAG  
 TGCCTGATCTCTCTGCTTACTGTTTCCTTCTGTAGCAAAATAAAAGTGGTAATAAAAAACATTTGAGC  
 ATTTCAAAAAAAAAAAAAAAAAAAAA

PREDICTED: Populus alba epidermis-specific secreted glycoprotein EP1-like (LOC118043395), mRNA.  
 XM\_035051360.1

| Descriptions                                             |                                                                                                    |                    |           |             |             |         |            |          |                                |
|----------------------------------------------------------|----------------------------------------------------------------------------------------------------|--------------------|-----------|-------------|-------------|---------|------------|----------|--------------------------------|
| Sequences producing significant alignments               |                                                                                                    |                    |           |             |             |         |            |          |                                |
| Download Select columns Show 100                         |                                                                                                    |                    |           |             |             |         |            |          |                                |
| select all 27 sequences selected                         |                                                                                                    |                    |           |             |             |         |            |          |                                |
| GenBank Graphics Distance tree of results New MSA Viewer |                                                                                                    |                    |           |             |             |         |            |          |                                |
|                                                          | Description                                                                                        | Scientific Name    | Max Score | Total Score | Query Cover | E value | Per. Ident | Acc. Len | Accession                      |
| <input checked="" type="checkbox"/>                      | PREDICTED: Populus alba epidermis-specific secreted glycoprotein EP1-like (LOC118043395), mRNA     | Populus alba       | 2760      | 2760        | 98%         | 0.0     | 99.87%     | 1542     | <a href="#">XM_035051360.1</a> |
| <input checked="" type="checkbox"/>                      | PREDICTED: Populus trichocarpa epidermis-specific secreted glycoprotein EP1 (LOC18095492), mRNA    | Populus trichoc... | 2398      | 2398        | 98%         | 0.0     | 95.46%     | 1660     | <a href="#">XM_006370091.2</a> |
| <input checked="" type="checkbox"/>                      | PREDICTED: Populus euphratica epidermis-specific secreted glycoprotein EP1-like (LOC105117520),... | Populus euphra...  | 2337      | 2337        | 98%         | 0.0     | 94.57%     | 1561     | <a href="#">XM_011015205.1</a> |
| <input checked="" type="checkbox"/>                      | PREDICTED: Populus euphratica epidermis-specific secreted glycoprotein EP1-like (LOC10511758),...  | Populus euphra...  | 2320      | 2320        | 98%         | 0.0     | 94.38%     | 1553     | <a href="#">XM_011007210.1</a> |
| <input checked="" type="checkbox"/>                      | PREDICTED: Populus trichocarpa epidermis-specific secreted glycoprotein EP1 (LOC18103363), mRNA    | Populus trichoc... | 1458      | 1458        | 88%         | 0.0     | 86.30%     | 1545     | <a href="#">XM_024581031.1</a> |
| <input checked="" type="checkbox"/>                      | Populus trichocarpa clone POP038-L21, complete sequence                                            | Populus trichoc... | 1458      | 2681        | 88%         | 0.0     | 86.30%     | 106705   | <a href="#">AC214468.1</a>     |
| <input checked="" type="checkbox"/>                      | PREDICTED: Populus euphratica epidermis-specific secreted glycoprotein EP1-like (LOC105129278),... | Populus euphra...  | 1413      | 1413        | 88%         | 0.0     | 85.75%     | 1553     | <a href="#">XM_011031270.1</a> |
| <input checked="" type="checkbox"/>                      | PREDICTED: Populus alba epidermis-specific secreted glycoprotein EP1-like (LOC118038309), mRNA     | Populus alba       | 1408      | 1408        | 88%         | 0.0     | 85.67%     | 1560     | <a href="#">XM_035044633.1</a> |
| <input checked="" type="checkbox"/>                      | PREDICTED: Populus trichocarpa epidermis-specific secreted glycoprotein EP1 (LOC7455947), mRNA     | Populus trichoc... | 636       | 636         | 82%         | 2e-177  | 76.20%     | 1532     | <a href="#">XM_002316823.3</a> |
| <input checked="" type="checkbox"/>                      | PREDICTED: Populus alba epidermis-specific secreted glycoprotein EP1-like (LOC118038308), mRNA     | Populus alba       | 621       | 621         | 81%         | 6e-173  | 76.03%     | 1645     | <a href="#">XM_035044632.1</a> |
| <input checked="" type="checkbox"/>                      | PREDICTED: Populus trichocarpa epidermis-specific secreted glycoprotein EP1 (LOC7472351), mRNA     | Populus trichoc... | 586       | 586         | 81%         | 2e-162  | 75.55%     | 1413     | <a href="#">XM_024580973.1</a> |
| <input checked="" type="checkbox"/>                      | PREDICTED: Populus alba epidermis-specific secreted glycoprotein EP1-like (LOC118038307), mRNA     | Populus alba       | 564       | 564         | 81%         | 1e-155  | 75.22%     | 1478     | <a href="#">XM_035044631.1</a> |
| <input checked="" type="checkbox"/>                      | PREDICTED: Populus euphratica epidermis-specific secreted glycoprotein EP1-like (LOC105129277),... | Populus euphra...  | 536       | 536         | 71%         | 2e-147  | 75.92%     | 1503     | <a href="#">XM_011031269.1</a> |

>2-5

ACTTTGAAATCCGAAACAATTGTCCTTACACTGTGTGGGCCGCAGCCTCACCTGGCGGTGGGCGCCGT  
 CTAGACCGTGGCCAAACTTGAATCTTAACGTGCCTGCTGGCACGTCCATGGCTCGTATATGGGGCCG  
 GACAAATTGTAACTTTGATGGTAGCGGTACGGGTCTGTTGCCAAACCGGGGATTGCACCGGTGGCCTA  
 CAGTGCAAGGGCTGGGGTGTCCCTCCCAACACTCTAGCAGAATATGCGTTAAATCAGTTTGGTGACTT  
 GGATTTTTATGATATATCGCTTGTTGATGGATTTAATATCCCTATGGAATTTAGTCCAACATCAAGCGG  
 TGGCTCAGGGAAGTGTCAAGCGCTTCTGTGCACAGCAGATATTAATGGGCAATGTCCTAATGAATTG  
 AGGGCTCCTGGGGGGTGTAAATAACCCATGCACTGTGTTCAAAACTAACGAATACTGCTGCACTAATG  
 GGCAGGGGAGCTGTGGCCCTACCTATTTCTCAAGGTTTTTTAAGGATAGGTGCCCTACTTCTTACAGC  
 TATCCCCAGGATGACCCTTCGAGCACATTTACATGCCCTGGCGGGACCAACTATAGGGTTGTCTTTTG  
 CCCTCGGGGGTCTCCTCATTTCCCTTGGAGATGGTTGAAGAACAGCGTGCAGAGTAAGCAAGAAGC  
 TAAGAACATAGCTGACGACTTGATTTATAATAAATATTATGTGCTGCCTTGAAAACCTTGGTGAGTTGA  
 GGTCCGTGTGTTATGTACGTATGGCTGTGTGTATCTTTTTTCTTTTCTTTTCTTTTCTGCTAAAAGAACAAA  
 AAACGAGTCTGTGTTTTGTTCTTGCCTGTTTCCATGCTGGGATGTAATAAAAATTCCAGTGAAATAAA  
 GAAATGTTTAATCACAAAAAAAAAAAAAAAAAAAAAAAAAAAA

PREDICTED: Populus alba osmotin-like protein OSM34 (LOC118033711), mRNA. XM\_035038801.1

| Descriptions | Graphic Summary | Alignments | Taxonomy |
|--------------|-----------------|------------|----------|
|--------------|-----------------|------------|----------|

Sequences producing significant alignments

Download 

New

 Select columns Show 100 ?

☒ select all 26 sequences selected

[GenBank](#) [Graphics](#) [Distance tree of results](#)

New

[MSA Viewer](#)

|                                     | Description                                                                       | Scientific Name                     | Max Score | Total Score | Query Cover | E value | Per. Ident | Acc. Len | Accession                      |
|-------------------------------------|-----------------------------------------------------------------------------------|-------------------------------------|-----------|-------------|-------------|---------|------------|----------|--------------------------------|
| <input checked="" type="checkbox"/> | PREDICTED: Populus alba osmotin-like protein OSM34 (LOC118033711). mRNA           | Populus alba                        | 1489      | 1489        | 97%         | 0.0     | 96.39%     | 1108     | <a href="#">XM_035038801.1</a> |
| <input checked="" type="checkbox"/> | PREDICTED: Populus trichocarpa osmotin-like protein OSM34 (LOC7472761). mRNA      | Populus trichocarpa                 | 1445      | 1445        | 97%         | 0.0     | 95.77%     | 1024     | <a href="#">XM_002299485.3</a> |
| <input checked="" type="checkbox"/> | PREDICTED: Populus alba osmotin-like protein OSM34 (LOC118033665). mRNA           | Populus alba                        | 1151      | 1151        | 91%         | 0.0     | 91.51%     | 1024     | <a href="#">XM_035038738.1</a> |
| <input checked="" type="checkbox"/> | PREDICTED: Populus euphratica osmotin-like protein OSM34 (LOC105129023). mRNA     | Populus euphratica                  | 1136      | 1136        | 96%         | 0.0     | 90.08%     | 1039     | <a href="#">XM_011030919.1</a> |
| <input checked="" type="checkbox"/> | PREDICTED: Populus euphratica osmotin-like protein OSM34 (LOC105120343). parti... | Populus euphratica                  | 1120      | 1311        | 90%         | 0.0     | 96.20%     | 899      | <a href="#">XM_011018508.1</a> |
| <input checked="" type="checkbox"/> | PREDICTED: Populus euphratica osmotin-like protein OSM34 (LOC105129073). mRNA     | Populus euphratica                  | 1114      | 1305        | 90%         | 0.0     | 96.05%     | 973      | <a href="#">XM_011031003.1</a> |
| <input checked="" type="checkbox"/> | Populus deltoides pathogenesis-related thaumatin (PR52-1). gene .partial cds      | Populus deltoides                   | 1083      | 1083        | 70%         | 0.0     | 96.61%     | 723      | <a href="#">GU129189.1</a>     |
| <input checked="" type="checkbox"/> | PREDICTED: Populus trichocarpa osmotin-like protein OSM34 (LOC7479328). mRNA      | Populus trichocarpa                 | 1053      | 1053        | 91%         | 0.0     | 89.70%     | 1017     | <a href="#">XM_002299511.3</a> |
| <input checked="" type="checkbox"/> | Populus trichocarpa x Populus deltoides clone WS0132_Q22 unknown mRNA             | Populus trichocarpa x Populus de... | 998       | 998         | 69%         | 0.0     | 94.90%     | 641      | <a href="#">EF148520.1</a>     |
| <input checked="" type="checkbox"/> | Populus balsamifera pathogenesis-related thaumatin (PR52-1). gene .partial cds    | Populus balsamifera                 | 627       | 627         | 41%         | 8e-175  | 95.87%     | 461      | <a href="#">GU129190.1</a>     |
| <input checked="" type="checkbox"/> | Populus nigra pathogenesis-related thaumatin (PR52-1). gene .partial cds          | Populus nigra                       | 616       | 616         | 41%         | 2e-171  | 94.57%     | 461      | <a href="#">GU129188.1</a>     |
| <input checked="" type="checkbox"/> | Hevea brasiliensis cultivar RR11-105 osmotin 2 gene .complete cds                 | Hevea brasiliensis                  | 477       | 477         | 69%         | 9e-130  | 80.34%     | 813      | <a href="#">MN683521.1</a>     |

>3-1

AGGCAAGACCATTACACTTGAGGTGGAGAGTTCTGACACCATTGATAATGTGAAAGCTAAGATCCAA  
GACAAGGAGGGTATCCCGCCAGACCAGCAGAGACTCATCTTTGCCGGCAAGCAGCTTGAGGATGGCC  
GTACCCTTGCGGATTATAACATCCAGAAGGAGTCCACCCTCCATTTGGTCCTTCGCTTTCGTGGTGGT  
ATGCAGATCTTTGTGAAGACCCTCACAGGAAAGACCATCACCTTGGAGGTGGAGAGCTCTGATACCA  
TTGACAATGTGAAAGCCAAGATCCAAGACAAGGAAGGCATCCCCCAGACCAGCAGAGGTTGATTTT  
TGCTGGGAAGCAGCTTGAAGATGGGAGGACTCTTGCTGACTACAACATTCAGAAGGAGTCAACCCTT  
CACCTGGTGCTGCGTCTCCGTGGAGGAATGCAGATTTTTGTCAAGACTTTGACCGGAAAGACCATCAC  
CCTGGAGGTCGAGAGCTCGGACACCATTGACAACGTGAAGGCCAAGATCCAGGACAAGGAAGGTAT  
TCCCCAGACCAACAAAGGTTGATCTTCGCTGGAAAGCAGTTGGAAGATGGGCGCACCTTGGCTGACT  
ACAATATCCAGAAGGAATCCACACTTCACCTTGTCCTTCGTCTCCGTGGTGGTTTTTAAGATGTGCTGT  
TCATGTTGTCCAAGATAATGTCTTGGTTTATATGCTATTACTCTGGATTATGGTTCTCTTGTGTGTTCA  
GTGGCCATCTTTGAATGGTTGCTTTTAATAATCTGTTGAACTCTTTTTAAAAAAAAAAAAAAAAAAAA  
AA

PREDICTED: Populus alba polyubiquitin-like (LOC118062990), mRNA. XM\_035076890.1

| Descriptions                                                                                                                          | Graphic Summary                             | Alignments | Taxonomy    |             |         |            |          |                                |
|---------------------------------------------------------------------------------------------------------------------------------------|---------------------------------------------|------------|-------------|-------------|---------|------------|----------|--------------------------------|
| Sequences producing significant alignments                                                                                            |                                             |            |             |             |         |            |          |                                |
| Download <span>New</span> Select columns <span>Show</span> 100 <span>?</span>                                                         |                                             |            |             |             |         |            |          |                                |
| <input checked="" type="checkbox"/> select all 100 sequences selected                                                                 |                                             |            |             |             |         |            |          |                                |
| <a href="#">GenBank</a> <a href="#">Graphics</a> <a href="#">Distance tree of results</a> <span>New</span> <a href="#">MSA Viewer</a> |                                             |            |             |             |         |            |          |                                |
| Description                                                                                                                           | Scientific Name                             | Max Score  | Total Score | Query Cover | E value | Per. Ident | Acc. Len | Accession                      |
| <input checked="" type="checkbox"/> <a href="#">PREDICTED: Populus alba polyubiquitin-like (LOC118062990).mRNA</a>                    | <a href="#">Populus alba</a>                | 1380       | 1380        | 97%         | 0.0     | 98.11%     | 1532     | <a href="#">XM_035076890.1</a> |
| <input checked="" type="checkbox"/> <a href="#">Populus trichocarpa clone WS0125_N24 unknown mRNA</a>                                 | <a href="#">Populus trichocarpa</a>         | 1341       | 1950        | 97%         | 0.0     | 97.23%     | 1438     | <a href="#">EF147905.1</a>     |
| <input checked="" type="checkbox"/> <a href="#">PREDICTED: Populus trichocarpa polyubiquitin (LOC18095912).mRNA</a>                   | <a href="#">Populus trichocarpa</a>         | 1336       | 1950        | 97%         | 0.0     | 97.10%     | 1544     | <a href="#">XM_006370571.2</a> |
| <input checked="" type="checkbox"/> <a href="#">Populus trichocarpa ubiquitin mRNA, complete cds</a>                                  | <a href="#">Populus trichocarpa</a>         | 1336       | 1944        | 97%         | 0.0     | 97.10%     | 1411     | <a href="#">FJ438462.1</a>     |
| <input checked="" type="checkbox"/> <a href="#">Populus trichocarpa clone WS0127_P02 unknown mRNA</a>                                 | <a href="#">Populus trichocarpa</a>         | 1336       | 1950        | 97%         | 0.0     | 97.10%     | 1435     | <a href="#">EF148144.1</a>     |
| <input checked="" type="checkbox"/> <a href="#">Populus trichocarpa clone PX0011_N13 unknown mRNA</a>                                 | <a href="#">Populus trichocarpa</a>         | 1336       | 1950        | 97%         | 0.0     | 97.10%     | 1448     | <a href="#">EF144248.1</a>     |
| <input checked="" type="checkbox"/> <a href="#">PREDICTED: Populus euphratica polyubiquitin (LOC105142396).mRNA</a>                   | <a href="#">Populus euphratica</a>          | 1301       | 1701        | 97%         | 0.0     | 96.34%     | 1484     | <a href="#">XM_011049998.1</a> |
| <input checked="" type="checkbox"/> <a href="#">Populus EST from leave</a>                                                            | <a href="#">Populus tremula x Popul...</a>  | 1243       | 1243        | 97%         | 0.0     | 94.87%     | 1003     | <a href="#">CU224824.1</a>     |
| <input checked="" type="checkbox"/> <a href="#">Populus EST from leave</a>                                                            | <a href="#">Populus tremula x Popul...</a>  | 1131       | 1131        | 84%         | 0.0     | 96.37%     | 1246     | <a href="#">CU222992.1</a>     |
| <input checked="" type="checkbox"/> <a href="#">Poplar cDNA sequences</a>                                                             | <a href="#">Populus trichocarpa x Po...</a> | 1118       | 1118        | 81%         | 0.0     | 97.27%     | 712      | <a href="#">CT029634.1</a>     |
| <input checked="" type="checkbox"/> <a href="#">Poplar cDNA sequences</a>                                                             | <a href="#">Populus trichocarpa x Po...</a> | 1118       | 1118        | 81%         | 0.0     | 97.27%     | 712      | <a href="#">CT029633.1</a>     |
| <input checked="" type="checkbox"/> <a href="#">Poplar cDNA sequences</a>                                                             | <a href="#">Populus trichocarpa x Po...</a> | 1118       | 1118        | 81%         | 0.0     | 97.27%     | 713      | <a href="#">CT029613.1</a>     |
| <input checked="" type="checkbox"/> <a href="#">Poplar cDNA sequences</a>                                                             | <a href="#">Populus trichocarpa x Po...</a> | 1083       | 1083        | 77%         | 0.0     | 97.77%     | 677      | <a href="#">CT029614.1</a>     |

>4-2

ATTGGGATCAAAAAGATCATCATCACAATCATCATTAATGTCATTATCACAATCATCATCACTTCCCAT  
CAATCCATGCCCACCTTCCAAATTCCCTATTTTGGTTTCTTGATCATTTCTCTGCTGTCTCAGTATGGTCA  
ATGGGAGCTGAAAGTGGGGTTCTTGAGACAACTAGTAGCTGAAAGTGGAGAAGAACACAAGCCC  
TTGTCTGCTGAAATATTGGGTTGCTCGGATTCCTTTTCTTCAGGCTTTTGAAGTGTGTTGAACCTTGT  
TTCTTGTAATAACGCAAGTGAGTTCGGTGAGTCGGACGTGGGTGTGTGTGATCGCCTGTGTAGCTA  
ACAATAAACATGTTTGGATCTGTGTTGCTCCTCTCCACTTGCTTTCTTGCTGCACACCTTTTGAGCTG  
CTGCATCTGTAGTAGTTTCTGTACAAGAAAAAGAATCGAATTTTAGCCATGTTTAGTGAGAAGAATCA  
AGATATTTTAAAGAAAAGAAGGAAAAA

PREDICTED: Populus alba probable WRKY transcription factor 27 (LOC118037092), mRNA. XM\_035042975.1

| Descriptions                                                                                                                          | Graphic Summary      | Alignments | Taxonomy    |             |         |            |          |                                |
|---------------------------------------------------------------------------------------------------------------------------------------|----------------------|------------|-------------|-------------|---------|------------|----------|--------------------------------|
| Sequences producing significant alignments                                                                                            |                      |            |             |             |         |            |          |                                |
| Download <span>New</span> Select columns <span>Show</span> 100 <span>?</span>                                                         |                      |            |             |             |         |            |          |                                |
| <input checked="" type="checkbox"/> select all 14 sequences selected                                                                  |                      |            |             |             |         |            |          |                                |
| <a href="#">GenBank</a> <a href="#">Graphics</a> <a href="#">Distance tree of results</a> <span>New</span> <a href="#">MSA Viewer</a> |                      |            |             |             |         |            |          |                                |
| Description                                                                                                                           | Scientific Name      | Max Score  | Total Score | Query Cover | E value | Per. Ident | Acc. Len | Accession                      |
| <input checked="" type="checkbox"/> PREDICTED: Populus alba probable WRKY transcription factor 27 (LOC118037092). mRNA                | Populus alba         | 778        | 778         | 84%         | 0.0     | 99.30%     | 1740     | <a href="#">XM_035042975.1</a> |
| <input checked="" type="checkbox"/> PREDICTED: Populus trichocarpa probable WRKY transcription factor 27 (LOC18106446). mR...         | Populus trichocarpa  | 778        | 778         | 84%         | 0.0     | 99.30%     | 1724     | <a href="#">XM_006372308.2</a> |
| <input checked="" type="checkbox"/> PREDICTED: Populus euphratica probable WRKY transcription factor 27 (LOC105140777). m...          | Populus euphratica   | 736        | 736         | 84%         | 0.0     | 97.67%     | 2003     | <a href="#">XM_011047753.1</a> |
| <input checked="" type="checkbox"/> PREDICTED: Populus trichocarpa probable WRKY transcription factor 27 (LOC7468350). mRNA           | Populus trichocarpa  | 479        | 479         | 84%         | 1e-130  | 86.70%     | 1727     | <a href="#">XM_002305235.3</a> |
| <input checked="" type="checkbox"/> PREDICTED: Populus alba probable WRKY transcription factor 27 (LOC118030321). mRNA                | Populus alba         | 455        | 455         | 74%         | 2e-123  | 88.45%     | 1547     | <a href="#">XM_035034378.1</a> |
| <input checked="" type="checkbox"/> PREDICTED: Populus euphratica uncharacterized LOC105120336 (LOC105120336). ncRNA                  | Populus euphratica   | 388        | 388         | 74%         | 2e-103  | 85.30%     | 1348     | <a href="#">XR_841307.1</a>    |
| <input checked="" type="checkbox"/> Malus domestica genome assembly, chromosome: 7                                                    | Malus domestica      | 132        | 132         | 33%         | 4e-26   | 80.70%     | 35442570 | <a href="#">OU744997.1</a>     |
| <input checked="" type="checkbox"/> Malus domestica genome assembly, chromosome: 7                                                    | Malus domestica      | 132        | 132         | 33%         | 4e-26   | 80.70%     | 35756407 | <a href="#">OU744959.1</a>     |
| <input checked="" type="checkbox"/> Malus domestica genome assembly, chromosome: 7                                                    | Malus domestica      | 132        | 132         | 33%         | 4e-26   | 80.70%     | 36203908 | <a href="#">OU744548.1</a>     |
| <input checked="" type="checkbox"/> Malus sylvestris genome assembly, chromosome: 7                                                   | Malus sylvestris     | 132        | 132         | 33%         | 4e-26   | 80.70%     | 35530347 | <a href="#">OU696509.1</a>     |
| <input checked="" type="checkbox"/> Malus domestica genome assembly, chromosome: 7                                                    | Malus domestica      | 132        | 132         | 33%         | 4e-26   | 80.70%     | 35293072 | <a href="#">OU696683.1</a>     |
| <input checked="" type="checkbox"/> PREDICTED: Malus domestica probable WRKY transcription factor 27 (LOC108173713). mRNA             | Malus domestica      | 128        | 128         | 31%         | 5e-25   | 80.86%     | 1813     | <a href="#">XM_017333280.2</a> |
| <input checked="" type="checkbox"/> PREDICTED: Tarenaya hassleriana probable WRKY transcription factor 27 (LOC104811943). ...         | Tarenaya hassleriana | 126        | 126         | 28%         | 2e-24   | 82.19%     | 1495     | <a href="#">XM_010538831.1</a> |

>4-5

AGTAAGGAACTGGAGAAGGAGCCCAAGTTCCTGAAGAACGGTGATGCTGGTATGATTAAGATGATTC  
CCACCAAGCCCATGGTGGTGGAGACTTTCTCAGCGTATCCTCCACTCGGTCGTTTTGCTGTGAGGGAC  
ATGCGCCAGACCGTTGCTGTGGGAGTTATCAAGAACGTGGAGAAGAAGGATCCCCTCTGGTGCTAAGG  
TGACCAAATCTGCTGCCAAGAAGGGTGCCAAGTGAACCGTGCAGGTTGATGCACTAAGAAGCTTTAA  
TAAAAATCAAGAGTGGGTTCTTGTTACTGGTCCATTTCTTGATGTCCATCTGTTCATTATGAGAACTG  
TAGTCTTAAGTCATCACCTTCATTGCAAGGCTTTTGTTCACAGAACTGGGTTCTTGATAGGCGGTGGC  
GGGGTTTTGGTCTTGATGTTTTTCCGAGTCATTGTTGTGTCTCCCATGTTGAGAATTTTAATCTGTTTT  
AATTTTCACTTGCTCTGCTGAGAGTTTAGTATTTTGCTGTGATGTTAAGTACCCATGAATACTGTTTAC  
AATTTTACTTGTCTAGTTTTTGTTCGTCTACTTAGTTTCTACCTATGCCTTTGTAGAAGAGTGATATTCT  
GAATGTTTTTTCAAAAAAAAAAAAAAAAAAAAAA

PREDICTED: Populus alba elongation factor 1-alpha (LOC118059947), mRNA. XM\_035072992.1

| Descriptions                                                          |                                                                                                                        | Graphic Summary                    | Alignments     | Taxonomy                 |             |         |            |          |                                |
|-----------------------------------------------------------------------|------------------------------------------------------------------------------------------------------------------------|------------------------------------|----------------|--------------------------|-------------|---------|------------|----------|--------------------------------|
| Sequences producing significant alignments                            |                                                                                                                        |                                    |                |                          |             |         |            |          |                                |
| Download                                                              |                                                                                                                        | New                                | Select columns | Show 100                 |             |         |            |          |                                |
| <input checked="" type="checkbox"/> select all 100 sequences selected |                                                                                                                        | GenBank                            | Graphics       | Distance tree of results |             |         |            |          |                                |
|                                                                       |                                                                                                                        | New MSA Viewer                     |                |                          |             |         |            |          |                                |
|                                                                       | Description                                                                                                            | Scientific Name                    | Max Score      | Total Score              | Query Cover | E value | Per. Ident | Acc. Len | Accession                      |
| <input checked="" type="checkbox"/>                                   | <a href="#">PREDICTED: Populus alba elongation factor 1-alpha (LOC118059947), mRNA</a>                                 | <a href="#">Populus alba</a>       | 1107           | 1107                     | 96%         | 0.0     | 98.56%     | 1988     | <a href="#">XM_035072992.1</a> |
| <input checked="" type="checkbox"/>                                   | <a href="#">PREDICTED: Populus trichocarpa elongation factor 1-alpha-like (LOC112328984), transcript variant X2...</a> | <a href="#">Populus trichoc...</a> | 1035           | 1035                     | 96%         | 0.0     | 96.49%     | 1859     | <a href="#">XM_024610823.1</a> |
| <input checked="" type="checkbox"/>                                   | <a href="#">PREDICTED: Populus trichocarpa elongation factor 1-alpha-like (LOC112328984), transcript variant X1...</a> | <a href="#">Populus trichoc...</a> | 1035           | 1035                     | 96%         | 0.0     | 96.49%     | 1916     | <a href="#">XM_024610822.1</a> |
| <input checked="" type="checkbox"/>                                   | <a href="#">PREDICTED: Populus trichocarpa elongation factor 1-alpha (LOC7489636), mRNA</a>                            | <a href="#">Populus trichoc...</a> | 1029           | 1029                     | 96%         | 0.0     | 96.33%     | 1915     | <a href="#">XM_002316315.3</a> |
| <input checked="" type="checkbox"/>                                   | <a href="#">Populus trichocarpa clone JGIACSB1089-D10, complete sequence</a>                                           | <a href="#">Populus trichoc...</a> | 989            | 1827                     | 96%         | 0.0     | 95.37%     | 39340    | <a href="#">AC208942.1</a>     |
| <input checked="" type="checkbox"/>                                   | <a href="#">PREDICTED: Populus euphratica elongation factor 1-alpha (LOC105137070), mRNA</a>                           | <a href="#">Populus euphra...</a>  | 915            | 915                      | 90%         | 0.0     | 94.87%     | 1825     | <a href="#">XM_011042649.1</a> |
| <input checked="" type="checkbox"/>                                   | <a href="#">Populus trichocarpa x Populus deltoides translation elongation factor 1 alpha mRNA, partial cds</a>        | <a href="#">Populus trichoc...</a> | 575            | 575                      | 58%         | 2e-159  | 92.86%     | 481      | <a href="#">GQ253565.1</a>     |
| <input checked="" type="checkbox"/>                                   | <a href="#">PREDICTED: Populus euphratica elongation factor 1-alpha-like (LOC105130805), mRNA</a>                      | <a href="#">Populus euphra...</a>  | 521            | 521                      | 71%         | 3e-143  | 86.97%     | 1404     | <a href="#">XM_011033484.1</a> |
| <input checked="" type="checkbox"/>                                   | <a href="#">PREDICTED: Populus trichocarpa elongation factor 1-alpha (LOC7457880), mRNA</a>                            | <a href="#">Populus trichoc...</a> | 516            | 516                      | 71%         | 1e-141  | 86.75%     | 1825     | <a href="#">XM_002311071.3</a> |
| <input checked="" type="checkbox"/>                                   | <a href="#">Populus trichocarpa clone WS01122_Q05 unknown mRNA</a>                                                     | <a href="#">Populus trichoc...</a> | 516            | 516                      | 71%         | 1e-141  | 86.75%     | 1742     | <a href="#">EF145289.1</a>     |
| <input checked="" type="checkbox"/>                                   | <a href="#">PREDICTED: Populus alba elongation factor 1-alpha-like (LOC118052437), mRNA</a>                            | <a href="#">Populus alba</a>       | 499            | 499                      | 72%         | 1e-136  | 85.77%     | 1805     | <a href="#">XM_035063421.1</a> |
| <input checked="" type="checkbox"/>                                   | <a href="#">PREDICTED: Populus alba elongation factor 1-alpha (LOC118059944), mRNA</a>                                 | <a href="#">Populus alba</a>       | 475            | 475                      | 67%         | 2e-129  | 87.05%     | 1864     | <a href="#">XM_035072988.1</a> |
| <input checked="" type="checkbox"/>                                   | <a href="#">PREDICTED: Populus euphratica elongation factor 1-alpha-like (LOC105137066), transcript variant X1...</a>  | <a href="#">Populus euphra...</a>  | 473            | 473                      | 67%         | 8e-129  | 86.36%     | 1856     | <a href="#">XM_011042642.1</a> |
