# Supplementary material for: Characterization and Interaction Analysis of the Secondary Cell Wall Synthesis-Related Transcription Factor PmMYB7 in Pinus massoniana Lamb
Source: MDPI journal article supplement (doi:10.3390/ijms23042079), 2022-02-14
Supplement: s1 [file s1]

## Supplementary 2

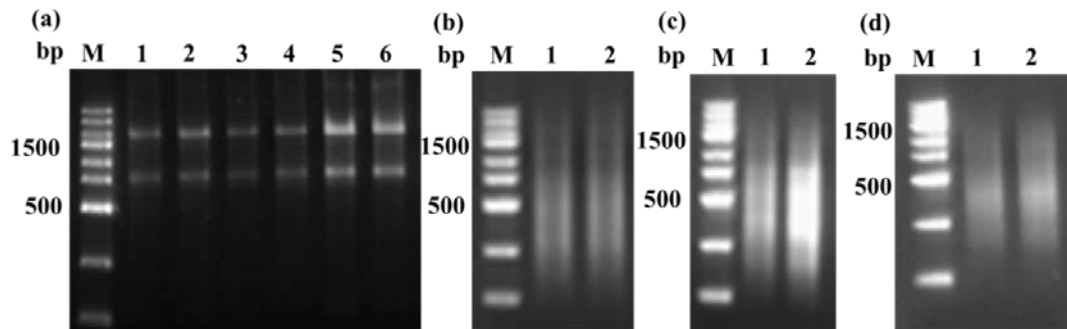

**Figure 1.** (a) Total RNA extracted from *P. massoniana*. M: DL 5000 DNA Marker; RNA samples from 1: leaves, 2: roots, 3: flowers, 4: shoots, 5: stems, 6: bark. (b, c d) M: NormalRunTM 250 bp-II DNA ladder; 1: mRNA or cDNA from *P. massoniana*; 2: Positive control.

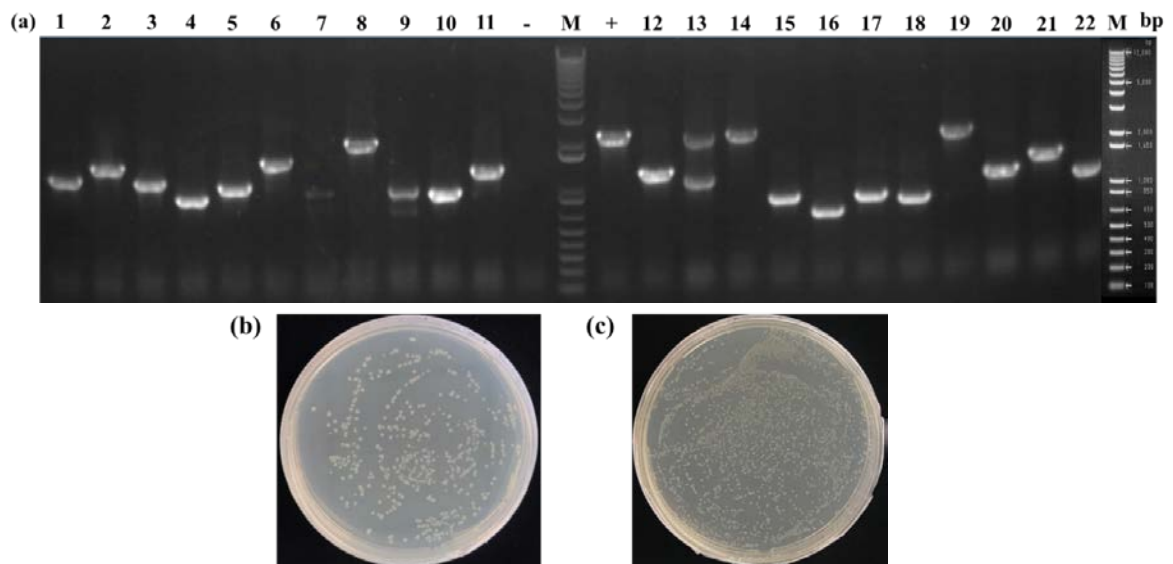

**Figure 2.** Quantification of the library by sequencing positive colonies and plate counting. (a) Agarose gel electrophoresis of PCR products from 22 randomly selected colonies. M: DL 12000 DNA Marker; 1-22: PCR products of 22 colonies; +: pGADT7-T vector as positive control; -: ddH<sub>2</sub>O as negative control. (b) Plate counting of 10000-fold diluted bacteria from the *E. coli* library. (c) Plate counting of 1000-fold diluted yeast cells from the yeast library.
