# Supplementary material for: Characterization and Interaction Analysis of the Secondary Cell Wall Synthesis-Related Transcription Factor PmMYB7 in Pinus massoniana Lamb
Source: MDPI journal article supplement (doi:10.3390/ijms23042079), 2022-02-14
Supplement: s1 [file s1]

## Supplementary 4

| Primer name            | Primer sequence                                          |
|------------------------|----------------------------------------------------------|
| MYB7-F:                | 5'- CAGGCTACGGTGGTGCAATCAG -3'                           |
| MYB7-R:                | 5'- CATCAGCGCCAGAAGGTCGCTG -3'                           |
| MYB7-5'GSP1:           | 5'- GGAGTCCACTTCCCAGCTGCTACAG -3'                        |
| MYB7-5'GSP2:           | 5'- CTCTCATGTATTCCACCACCGGCGGAAT -3'                     |
| MYB7-3'GSP1:           | 5'- CAGTCGGTGTCGATCCGCCGACCT -3'                         |
| MYB7-3'GSP2:           | 5'- CTCCCCGGCCGCACCGACAACGCGATCA -3'                     |
| MYB7-ORF-F:            | 5'- ATGGCGATGAGCAATGGGAGAT -3'                           |
| MYB7-ORF-R:            | 5'- TCATTTGTTGAGATGCAGGGCG -3'                           |
| MYB7-Q-F:              | 5'- CGGTGGTGGAATACATGAGA -3'                             |
| MYB7-Q-R:              | 5'- GCTGGTGATGACTGGACATA -3'                             |
| pJIT166-PmMYB7-F:      | 5'- tggagaggacagcccaagcttATGGCGATGAGCAATGGGA -3'         |
| pJIT166-PmMYB7-R:      | 5'- gctcaccatggatcctctagaTTTGTGAGATGCAGGGCG -3'          |
| pGADT7-Rec-F:          | 5'- CACTAACAGTAGCAACGGTCCG -3'                           |
| pGADT7-Rec-R:          | 5'- GGCAAGGTAGACAAGCCGACAAC -3'                          |
| pGBKT7-PmMYB7-F:       | 5'- atggccatggaggccgaattcATGGCGATGAGCAATGGGA -3'         |
| pGBKT7-PmMYB7-R:       | 5'- ccgctgcaggctcgacggatccTCATTTGTTGAGATGCAGGGC -3'      |
| pGADT7-PmCCoAOMT2-F:   | 5'- gccatggaggccagtgaattcATGGACATCAACAGAGAGAACTATGAA -3' |
| pGADT7-PmCCoAOMT2-R:   | 5'- cagctcgagctcgatggatccTCACTTGATCCGACGGCAGA -3'        |
| pGADT7-PmXYXT1-F:      | 5'- gccatggaggccagtgaattcATGGTGCAGTACTTTAGGTATCATCAG -3' |
| pGADT7-PmXYXT1-R:      | 5'- cagctcgagctcgatggatccGAGATGAGATCTGCGGTTTCATT -3'     |
| pBinGFP2-F             | 5'- TGAGCGAAACCCTATAAGAACCCT -3'                         |
| pBinGFP2-R             | 5'- CAGGTAGTGGTTGTCGGGCAGCAG -3'                         |
| pCAMBIA-N×myc-C×FLAG-F | 5'- ACTAATATCAGAGGAAGATTGGA -3'                          |
| pCAMBIA-N×myc-C×FLAG-R | 5'- AACATTTGGCAATAAAGTTTCTTA -3'                         |
