# Supplementary material for: Characterization and Interaction Analysis of the Secondary Cell Wall Synthesis-Related Transcription Factor PmMYB7 in Pinus massoniana Lamb
Source: Int J Mol Sci. 2022 Feb 14;23(4):2079. doi: 10.3390/ijms23042079 (PMC8877852; doi:10.3390/ijms23042079)
Supplement: Supplementary file 1 [file ijms-23-02079-s001.zip]

Archive with 4 entries (4 files):
- Supplementary 1.pdf
- Supplementary 2.pdf
- Supplementary 3.pdf
- Supplementary 4.pdf
